# Supplementary material for: Weak neuronal glycolysis sustains cognition and organismal fitness
Source: PubMed Central journal article supplement (PMC11272580; doi:10.1038/s42255-024-01049-0), 2024-05-24

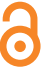

---

# Weak neuronal glycolysis sustains cognition and organismal fitness

---

In the format provided by the authors and unedited

# Flow cytometry workflow for Mitosox GFP<sup>+</sup> neurons experiments

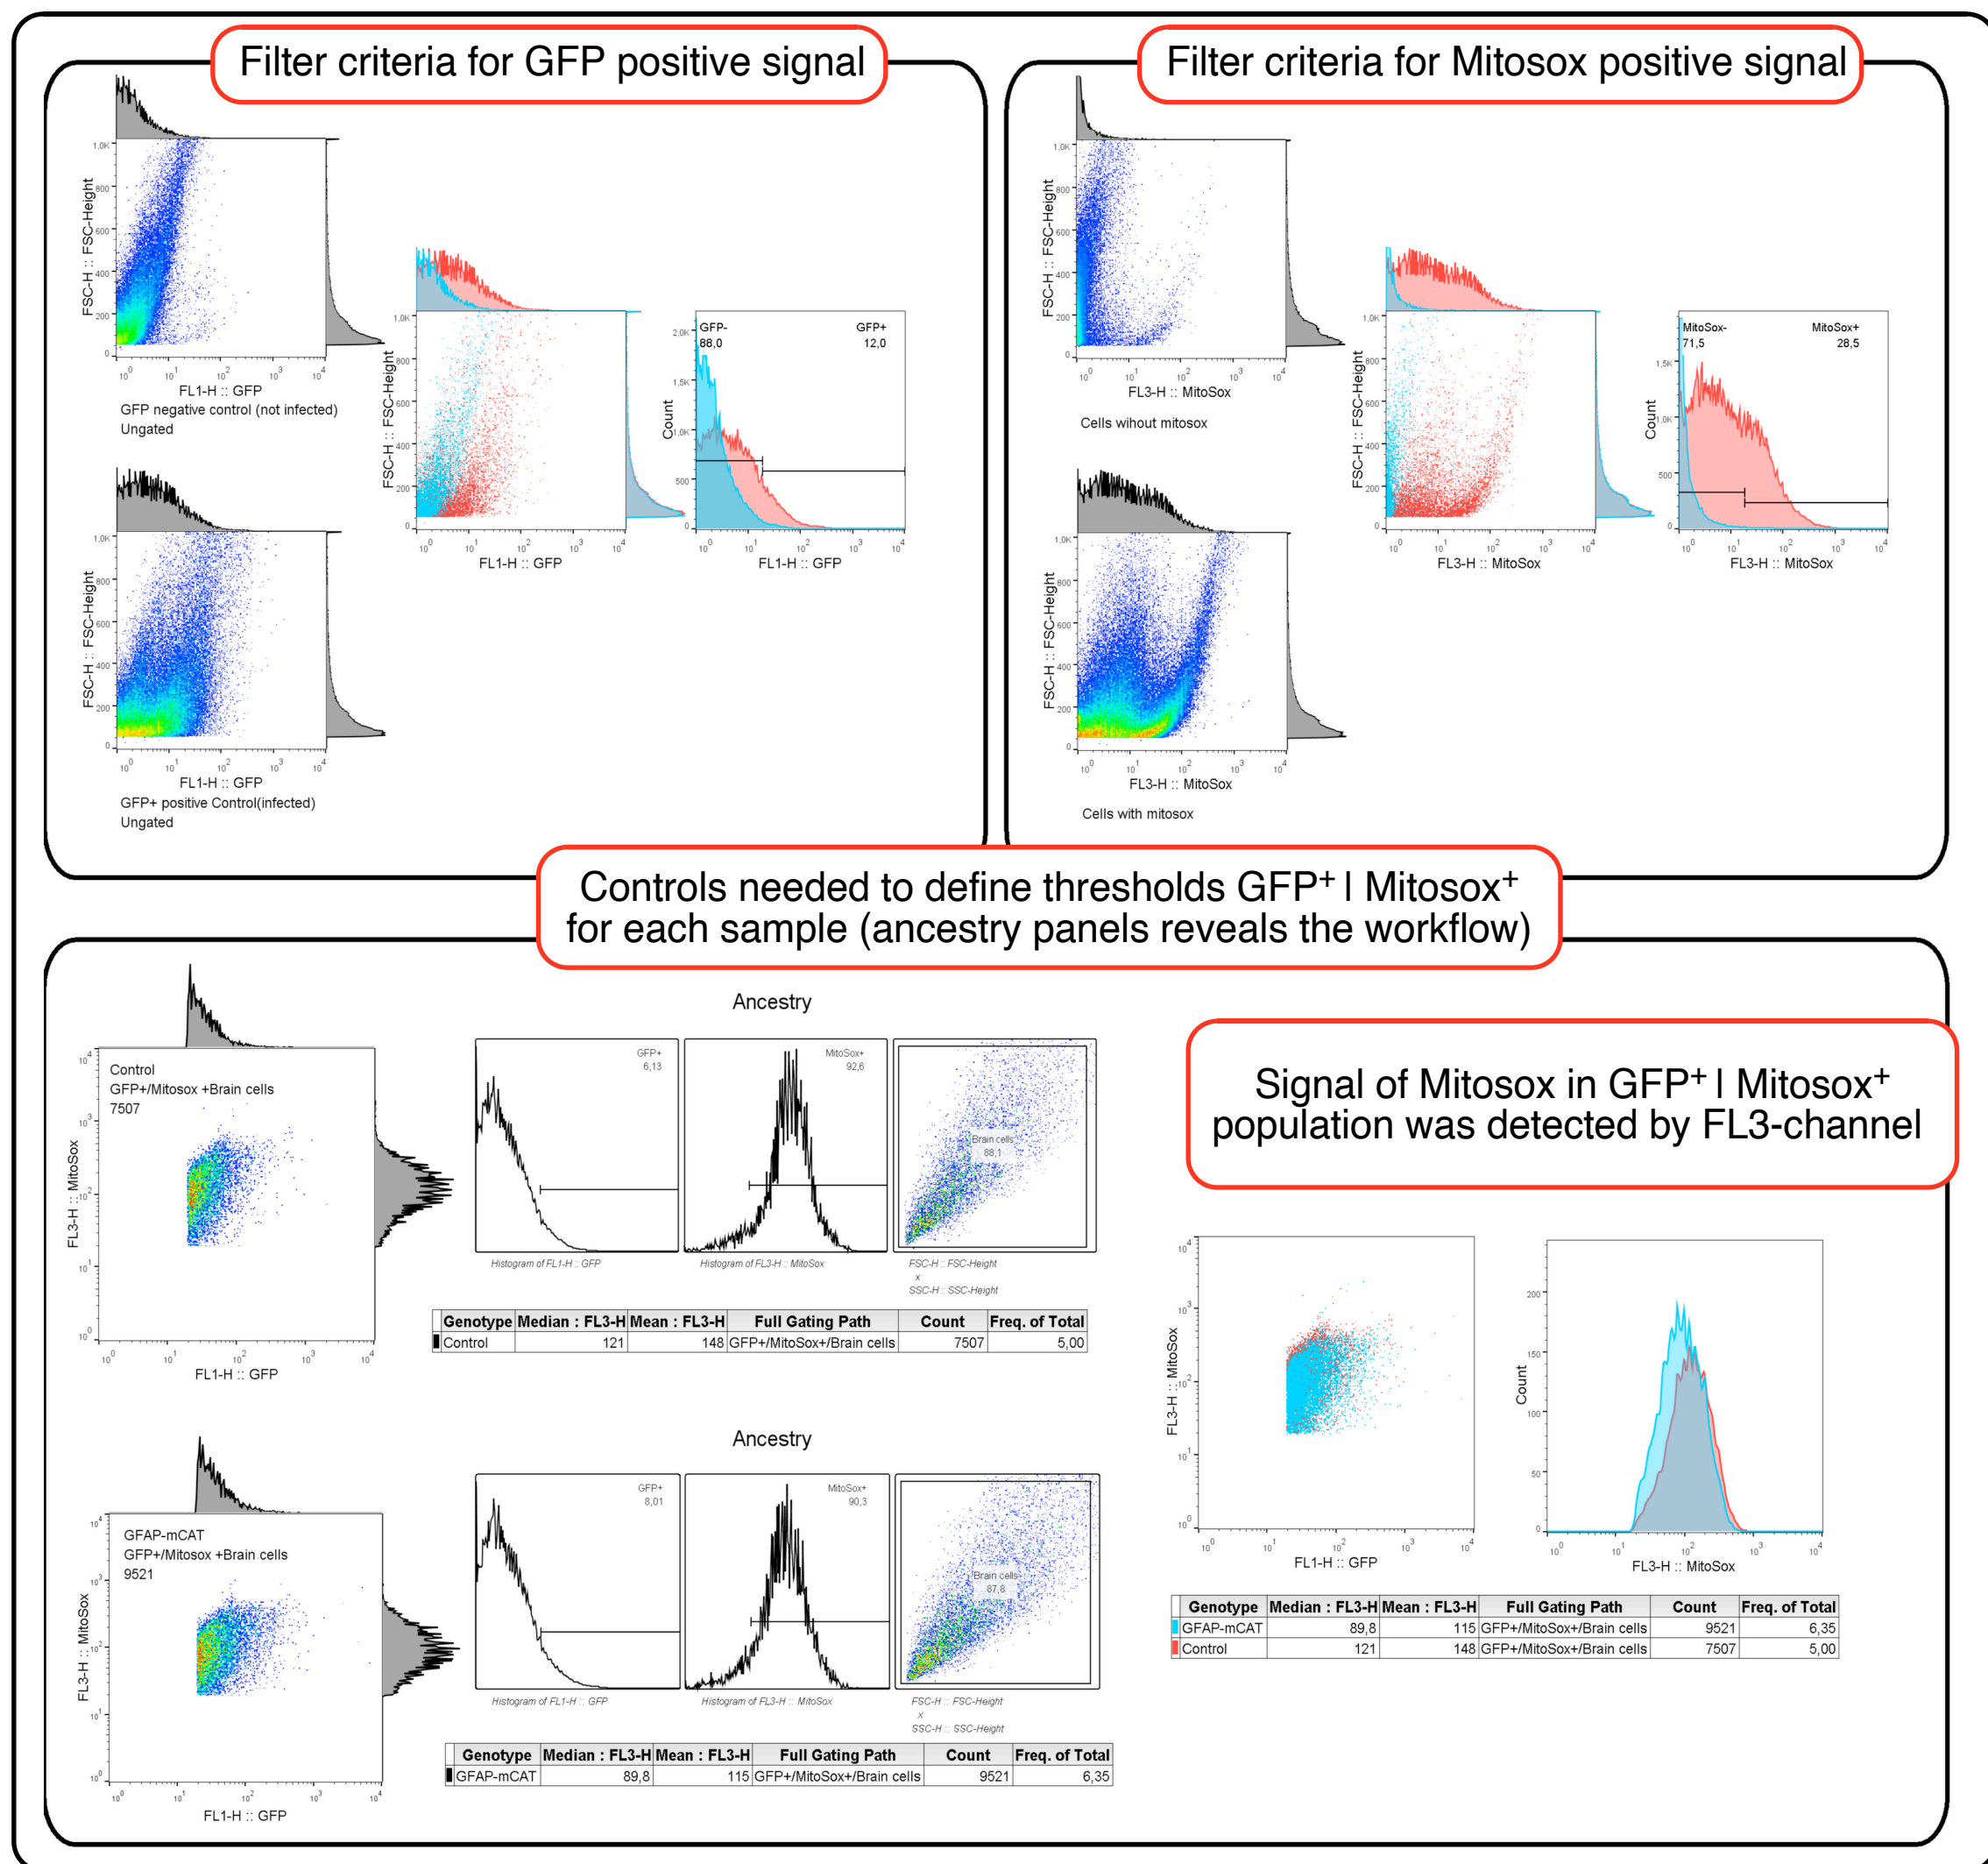

# Flow cytometry workflow for DiIC<sub>1</sub>(5) GFP<sup>+</sup> neurons experiments

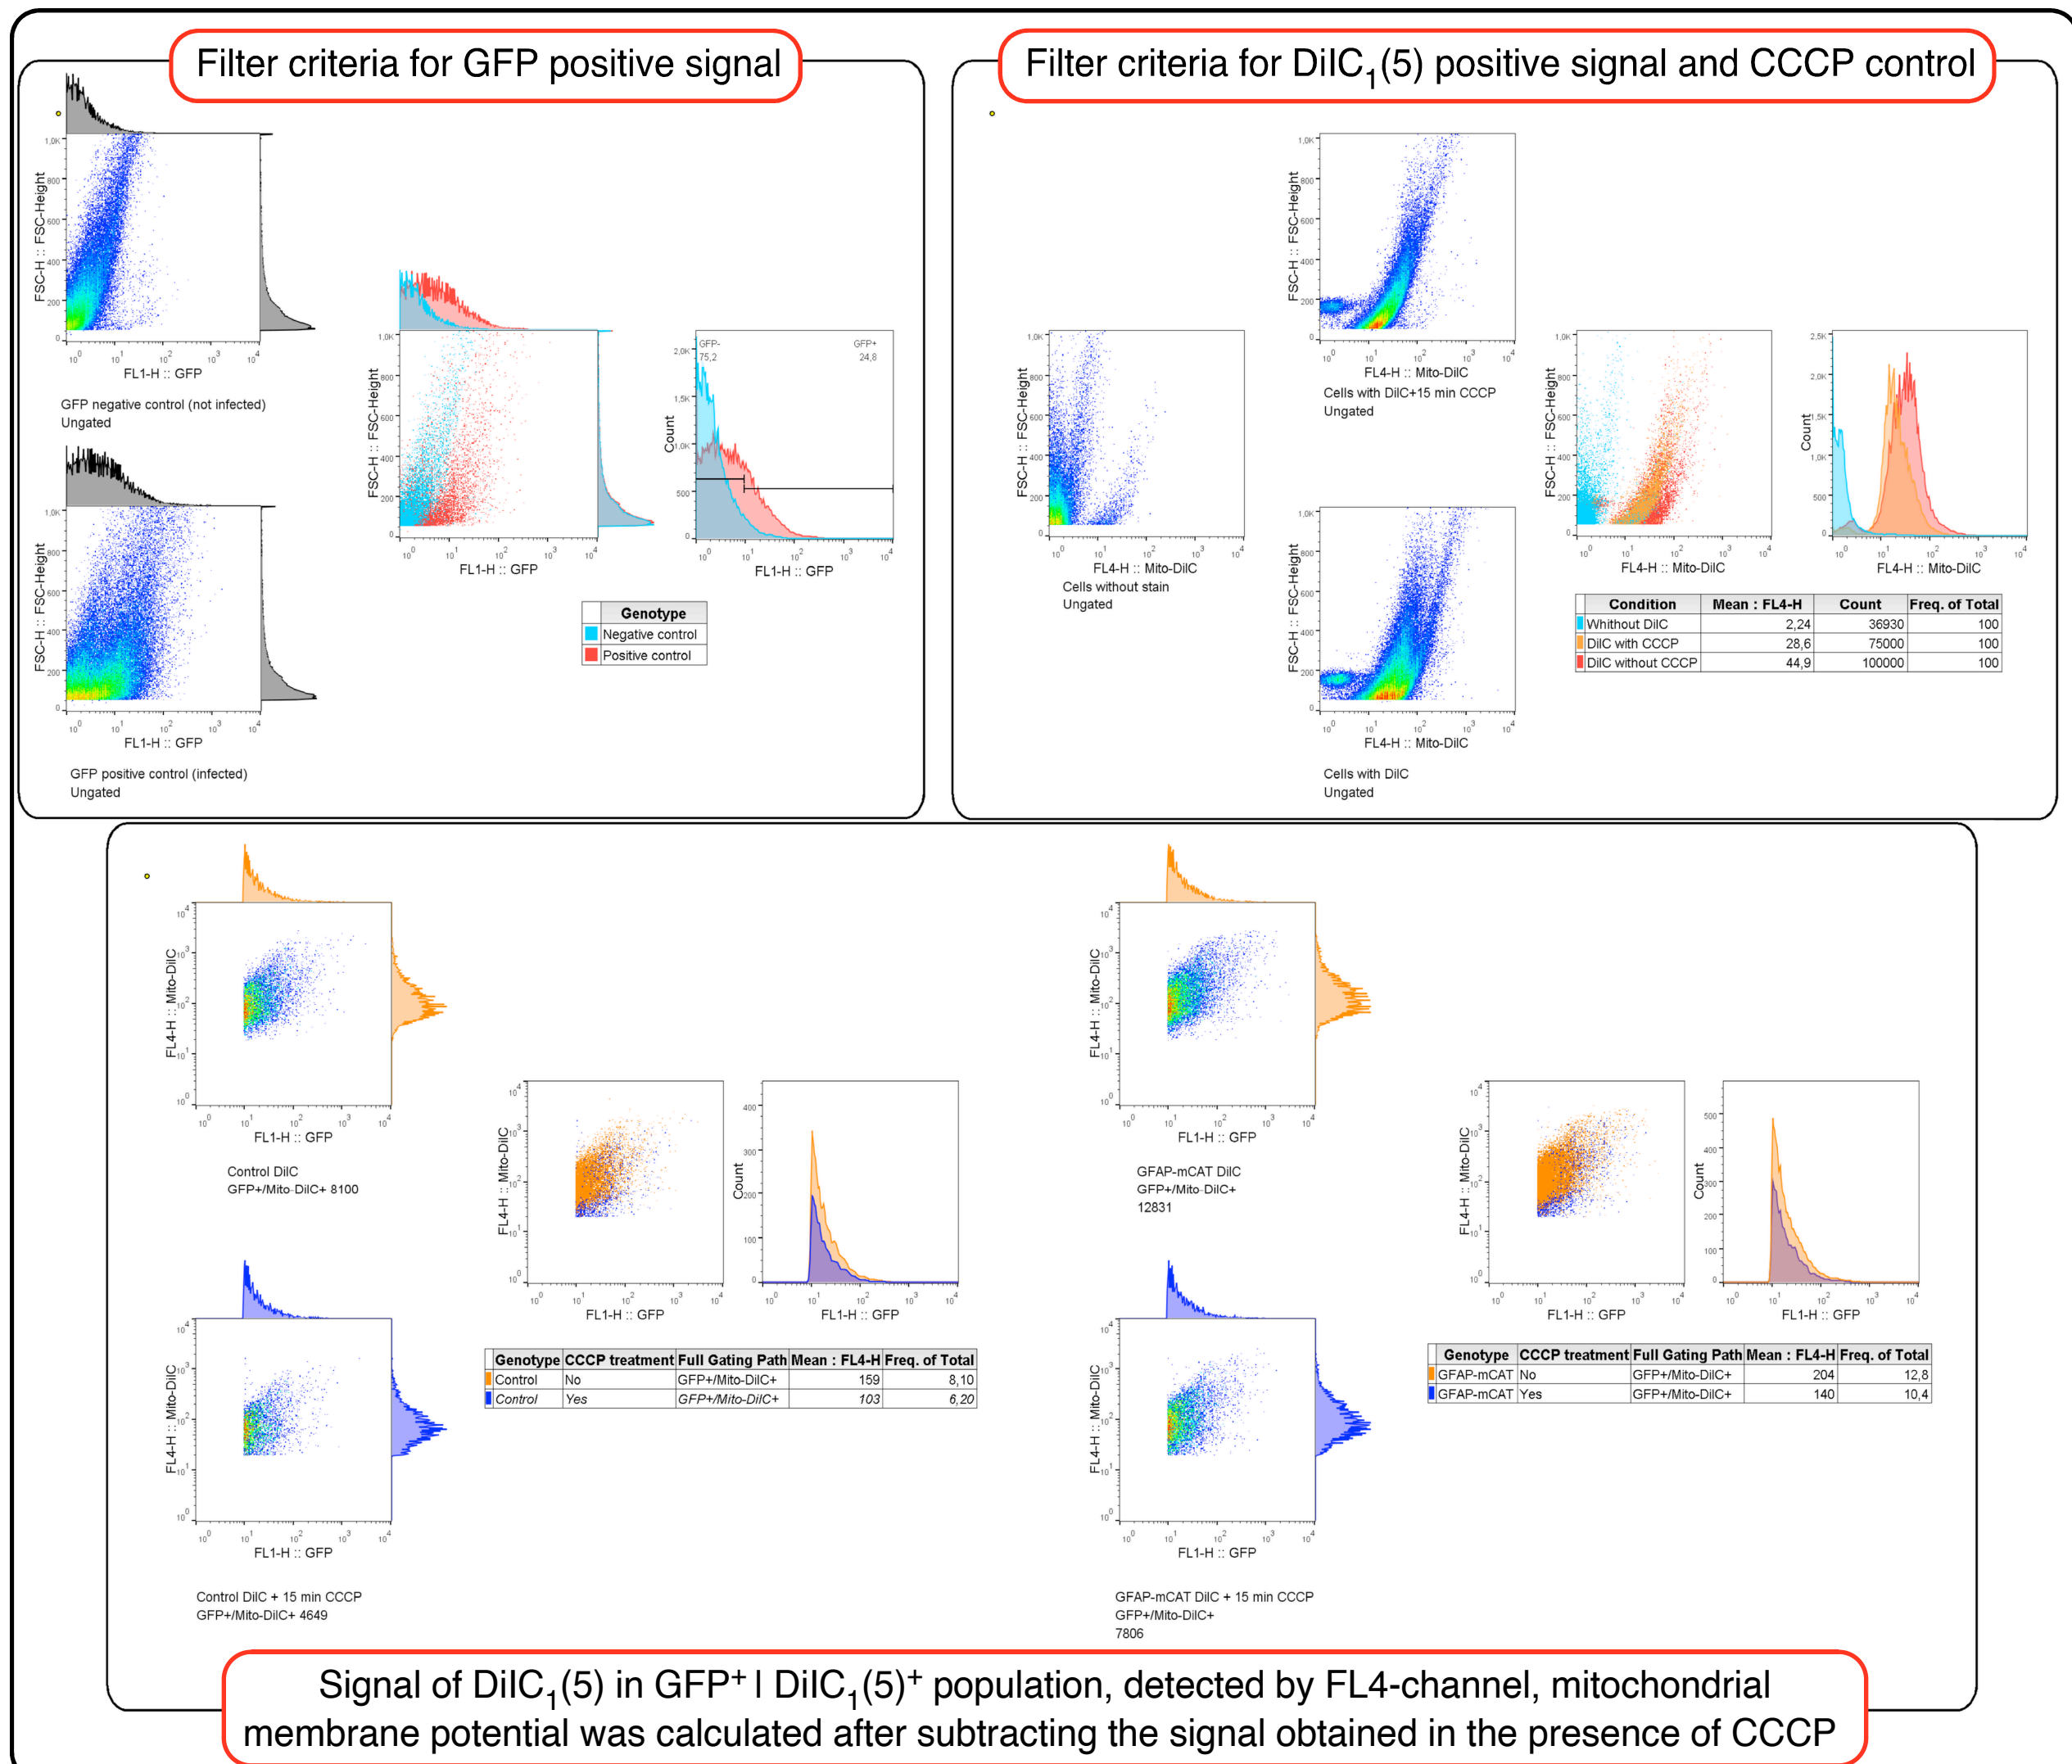

Supplement: 42255_2024_1049_MOESM1_ESM.pdf [file 42255_2024_1049_MOESM1_ESM.pdf]
