# Supplementary material for: Weak neuronal glycolysis sustains cognition and organismal fitness
Source: PubMed Central journal article supplement (PMC11272580; doi:10.1038/s42255-024-01049-0), 2024-05-24

# Uncropped Western Blots and their Replicas

Fig. 1b

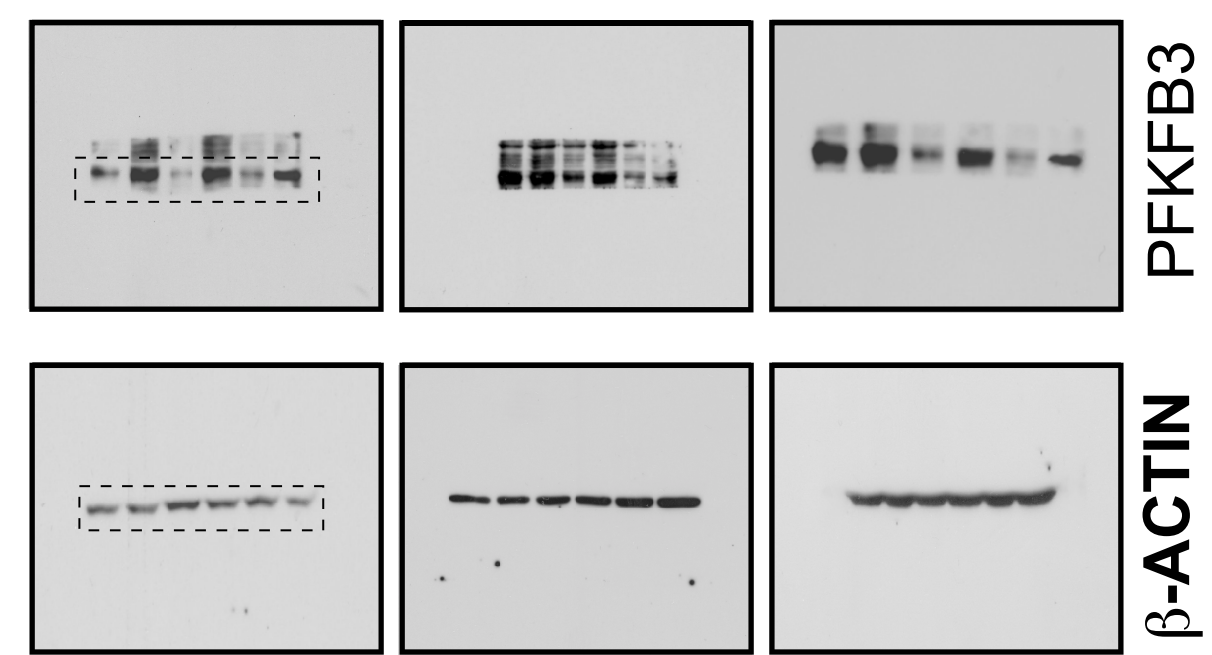

Fig. 1c

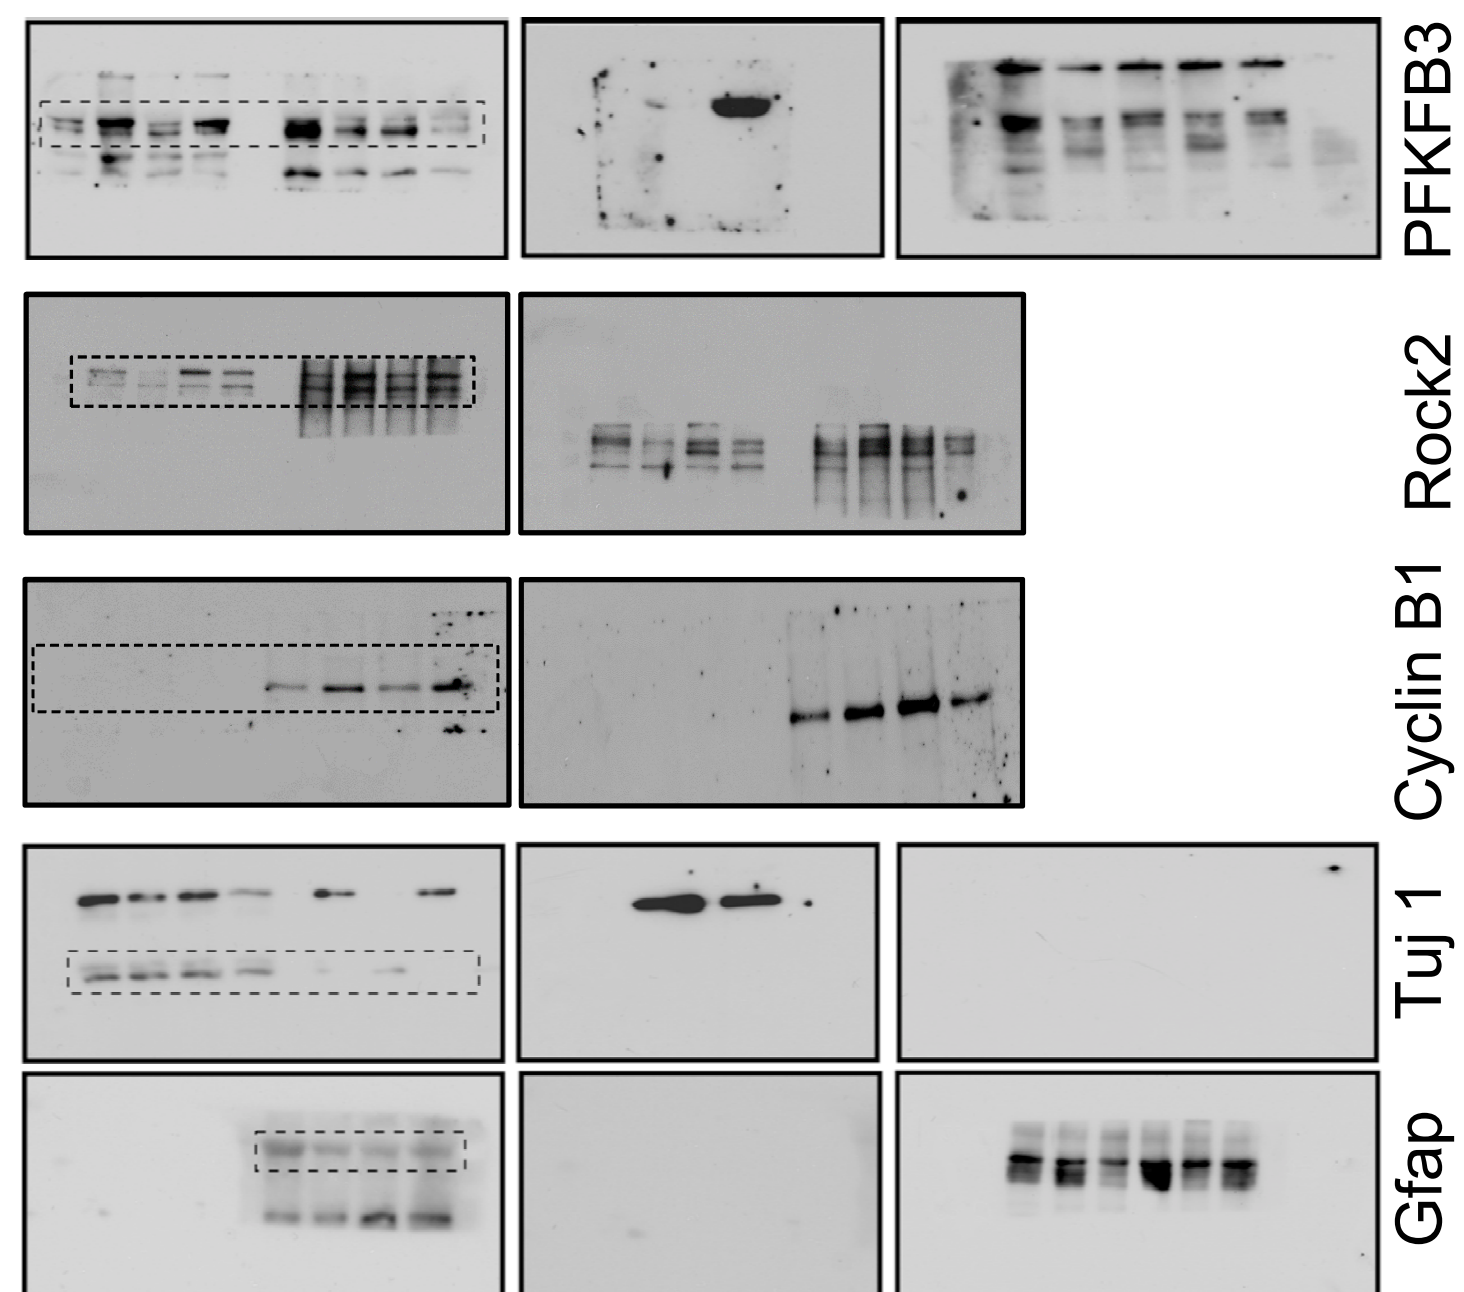

Fig. 2g

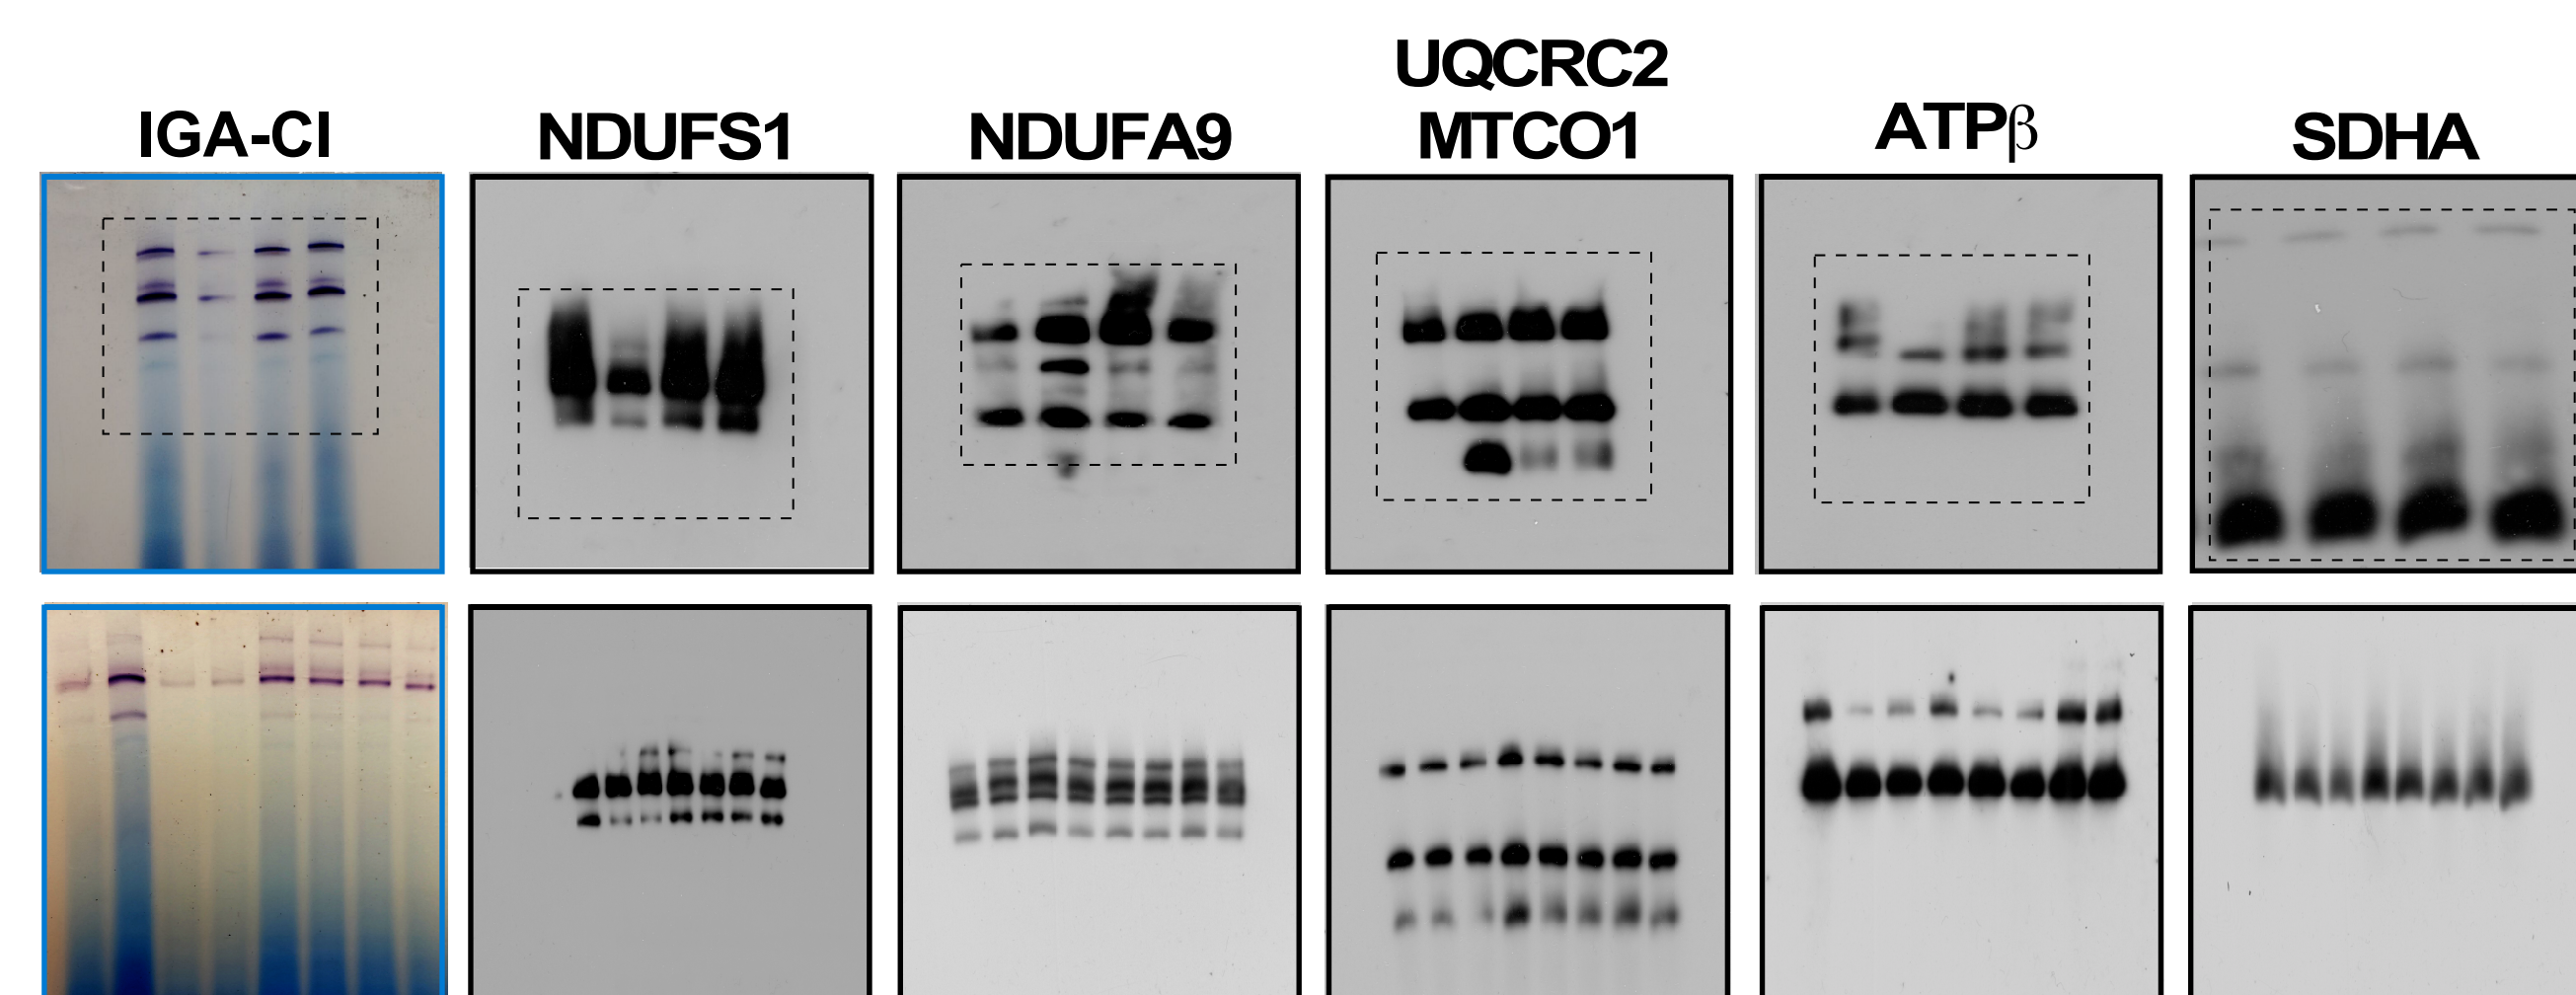

Fig. 3e

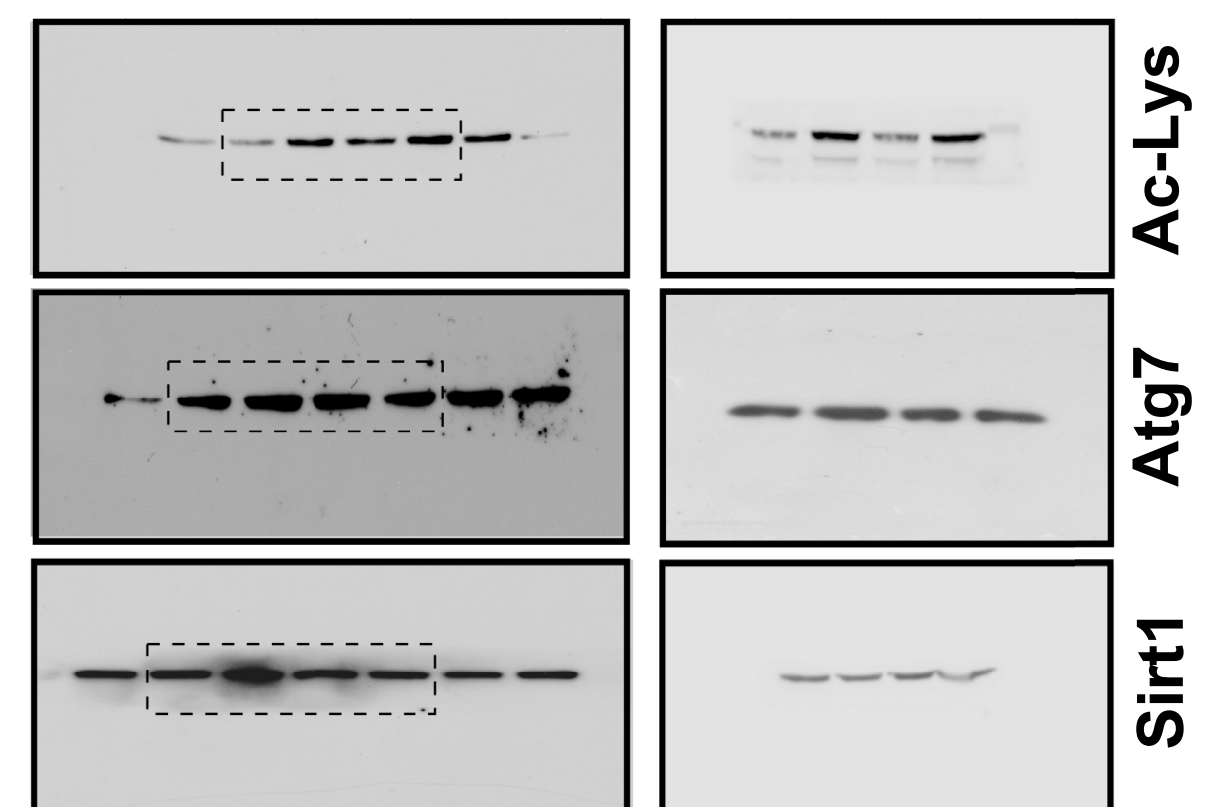

Fig. 3f

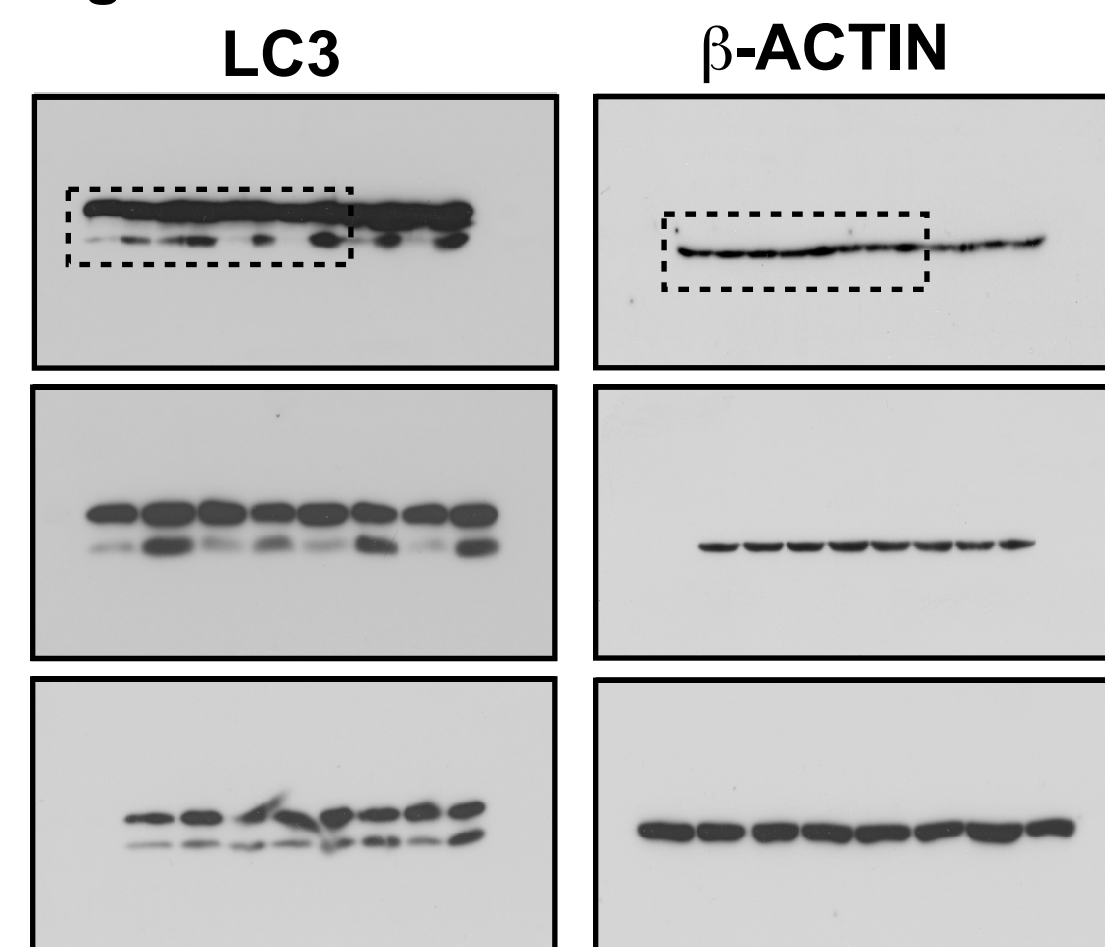

Fig. 3g

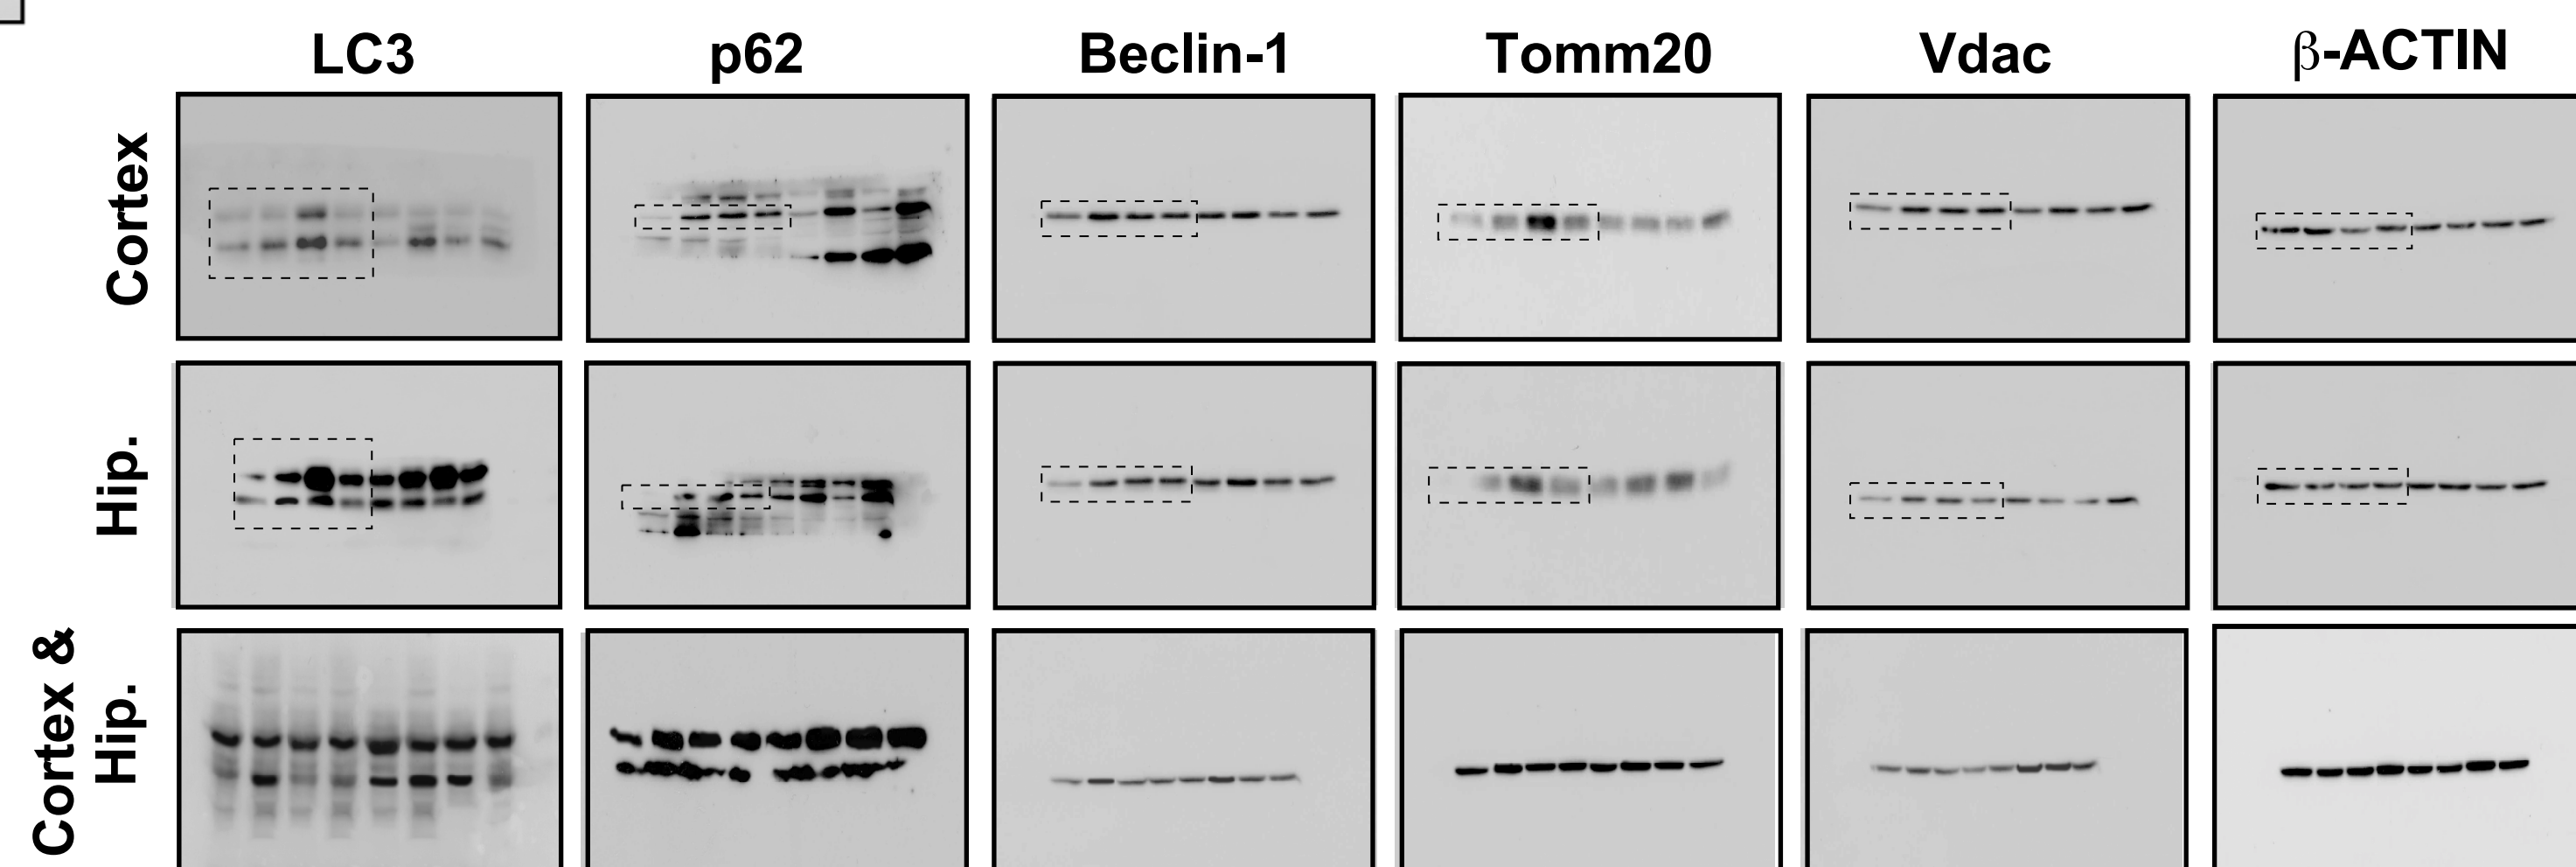

Fig. 3i

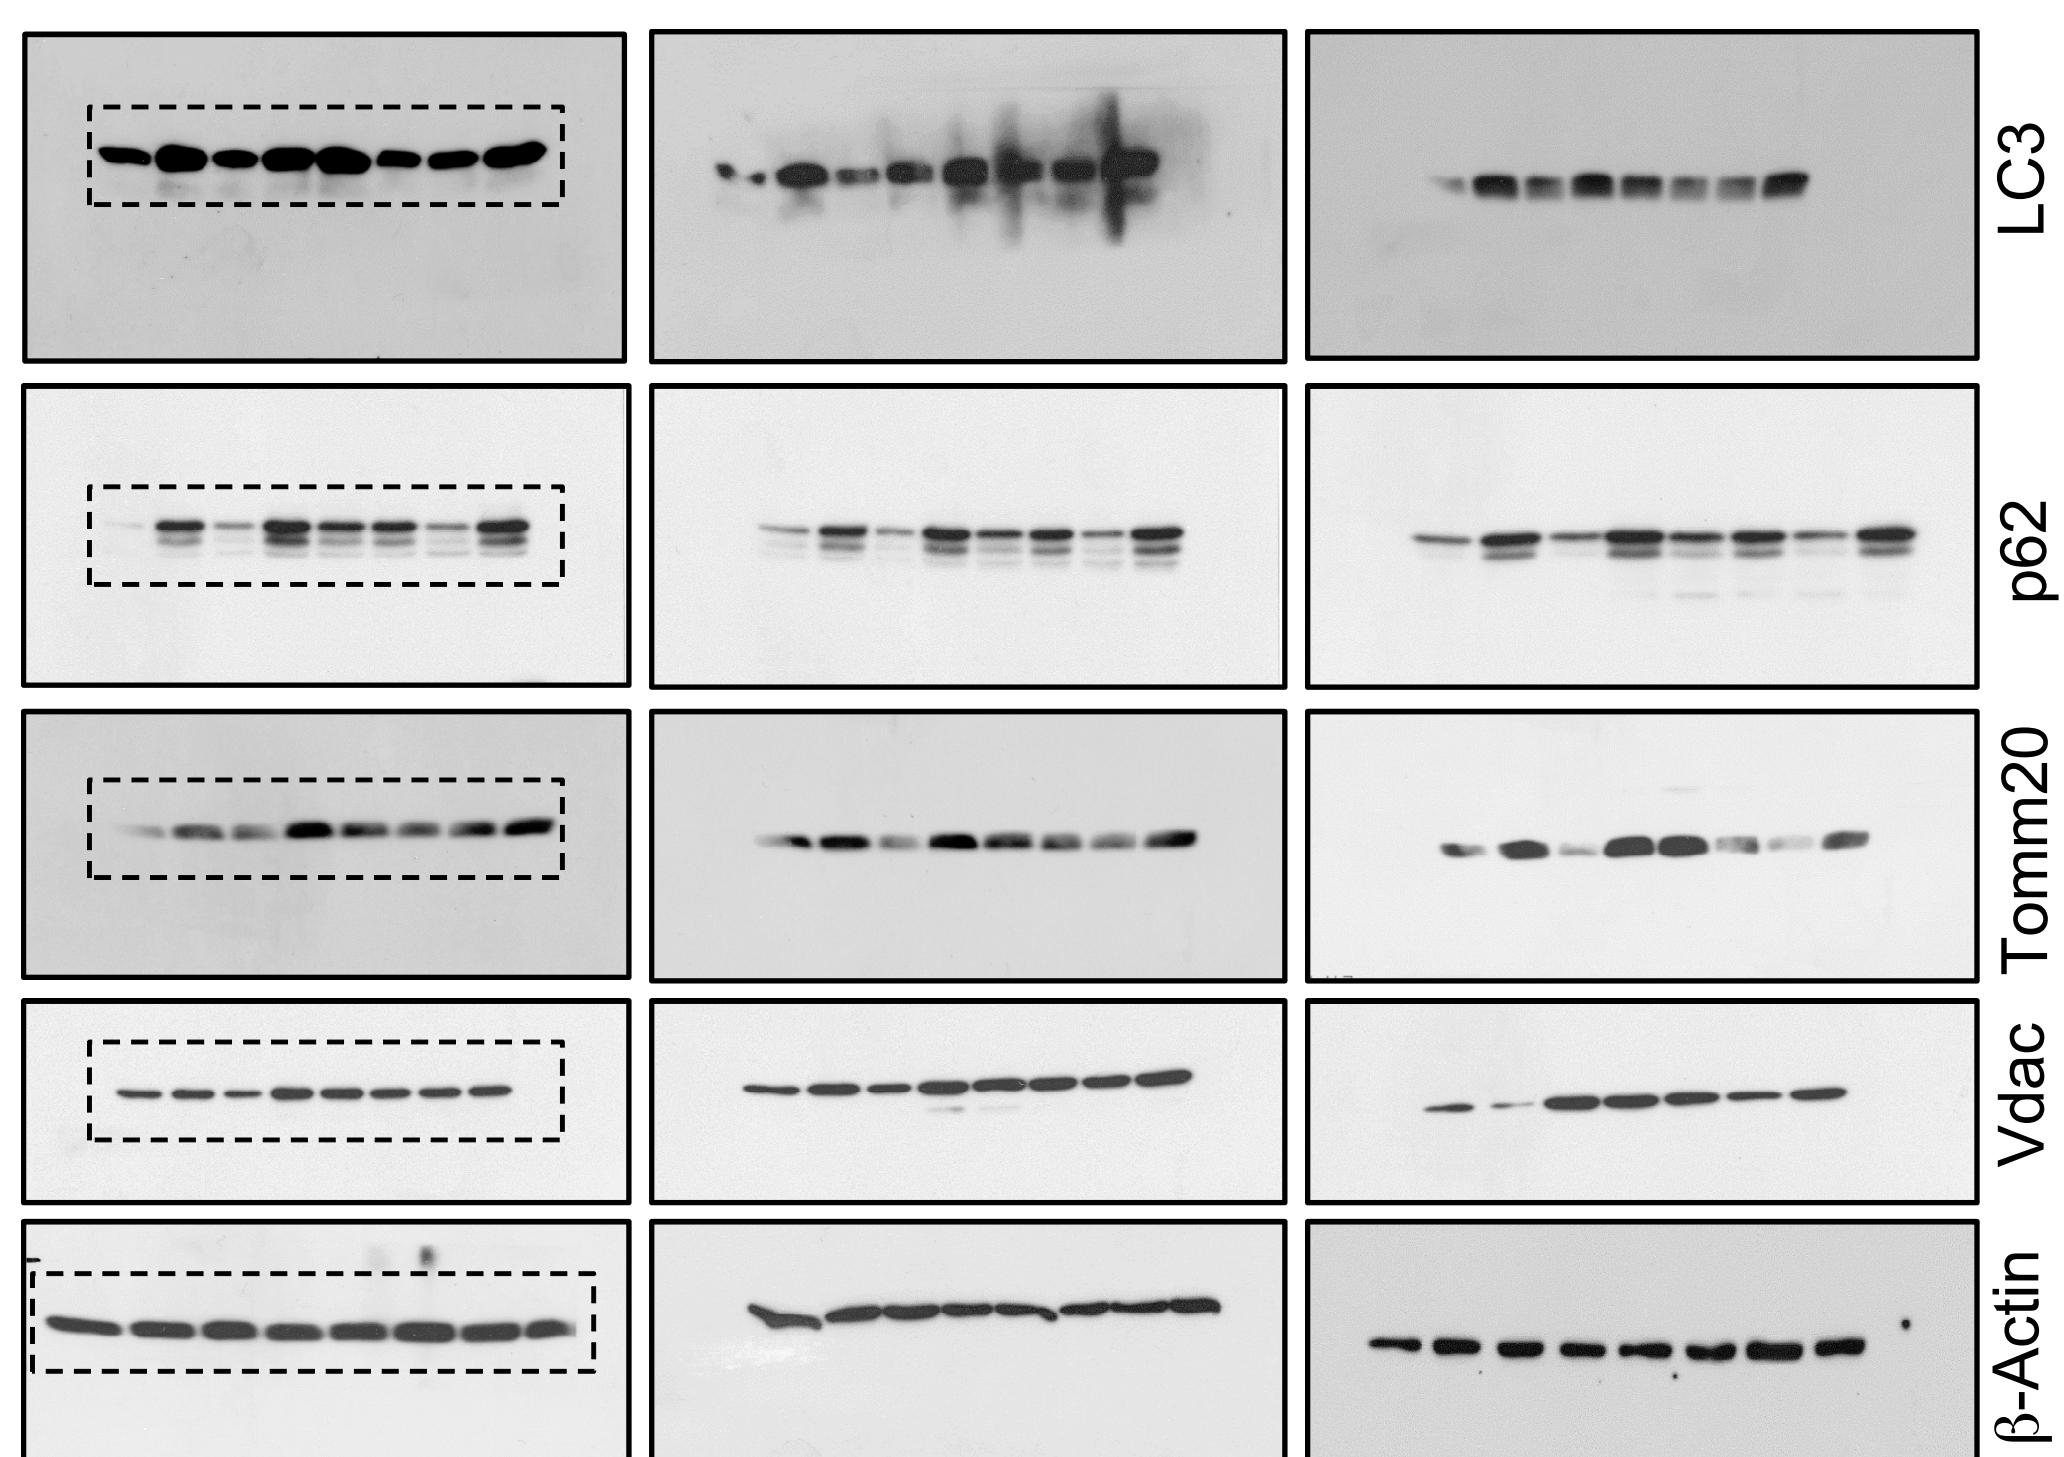

Fig. 4h

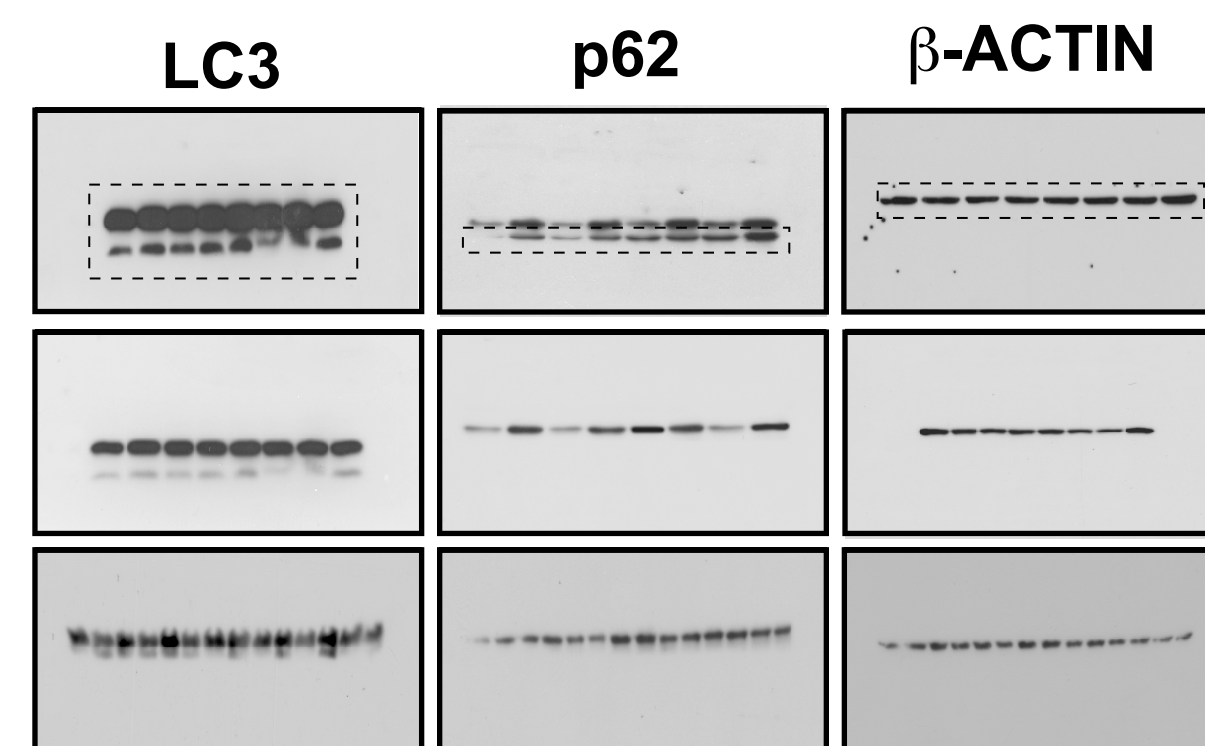

Extended Data Fig. 1h

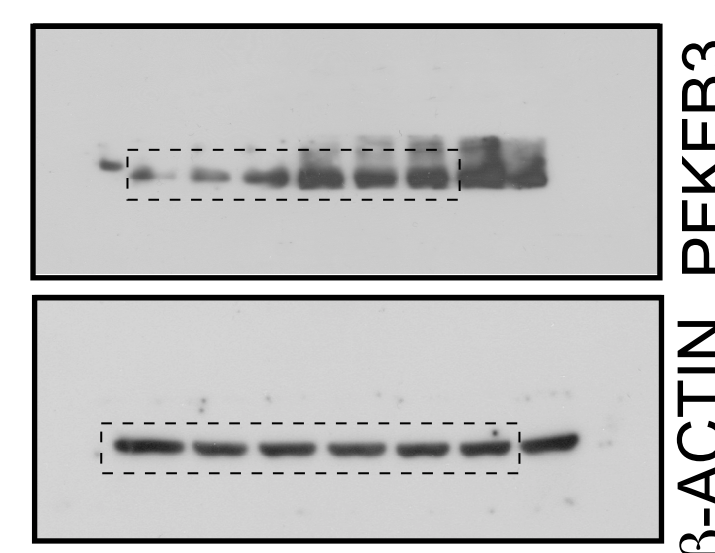

Extended Data Fig. 3c

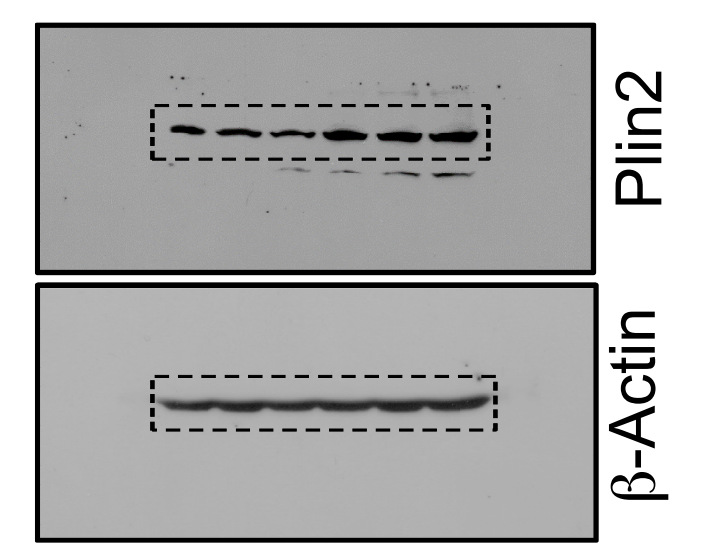

Extended Data Fig. 3d

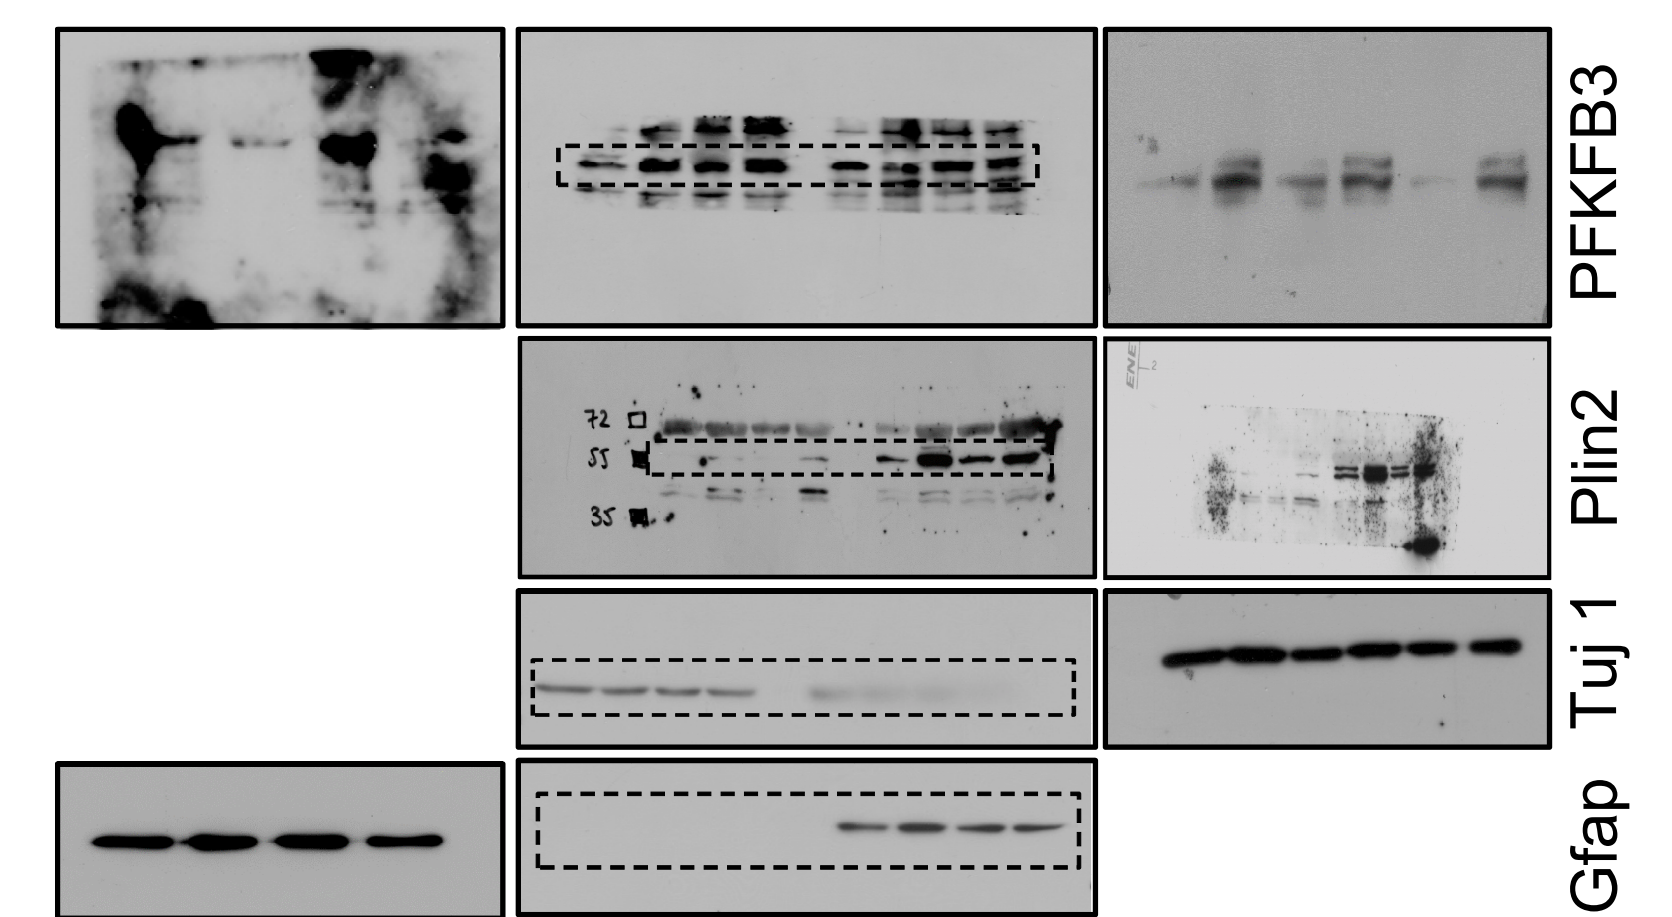

Extended Data Fig. 3i

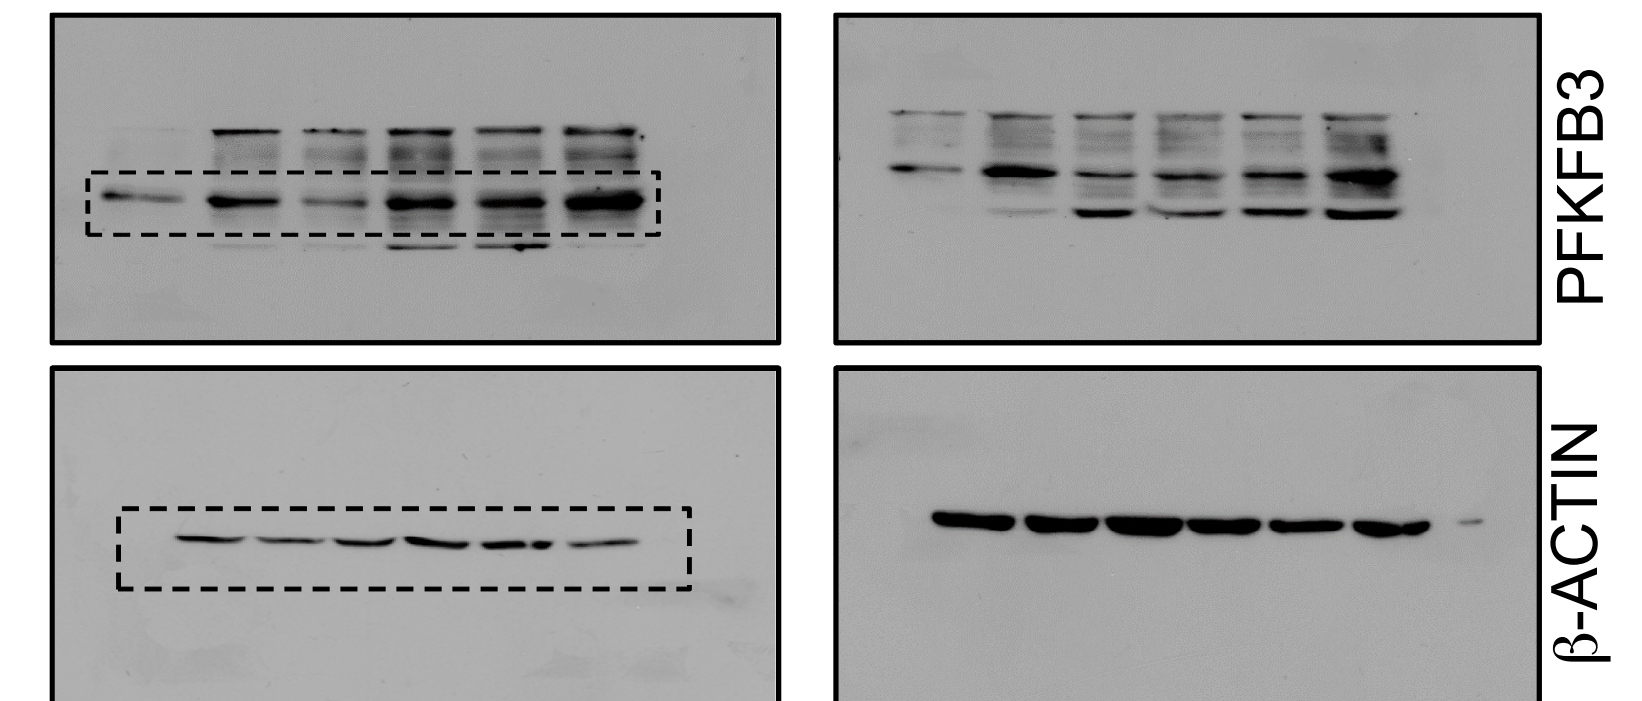

Supplement: 42255_2024_1049_MOESM14_ESM.pdf [file 42255_2024_1049_MOESM14_ESM.pdf]
